# Supplementary material for: Comparison of a User-Centered Design, Self-Management App to Existing mHealth Apps for Persons Living With HIV
Source: PubMed Central journal article supplement (PMC4704937; doi:10.2196/mhealth.4882), 2015-09-18
Supplement: mhealth_v3i3e91_app1.pdf [file mhealth_v3i3e91_app1.pdf]

Multimedia Appendix 1. Standardized Form to Extract App Characteristics

Record ID

App Name

|             |                                                      |                                                   |                                   |
|-------------|------------------------------------------------------|---------------------------------------------------|-----------------------------------|
| Search Term | HIV/AIDS treatment<br>HIV/AIDS care<br>HIV treatment | HIV medication<br>AIDS medication<br>HIV reminder | antiretroviral<br>living with HIV |
|-------------|------------------------------------------------------|---------------------------------------------------|-----------------------------------|

Price

Rating

Downloads

|                     |                                     |                                       |                  |
|---------------------|-------------------------------------|---------------------------------------|------------------|
| Targeted Population | MSM<br>Men<br>Youth/<br>Adolescents | Young Adults<br>Older Adults<br>Women | Homeless<br>None |
|---------------------|-------------------------------------|---------------------------------------|------------------|

|          |       |         |
|----------|-------|---------|
| Platform | Apple | Android |
|----------|-------|---------|

|               |                           |                          |
|---------------|---------------------------|--------------------------|
| Communication | <input type="radio"/> Yes | <input type="radio"/> No |
|---------------|---------------------------|--------------------------|

Communication Options

|                                 |                                                       |
|---------------------------------|-------------------------------------------------------|
| Setting My Medication Reminders | <input type="radio"/> Yes<br><input type="radio"/> No |
|---------------------------------|-------------------------------------------------------|

|                                         |                                                                             |                                            |
|-----------------------------------------|-----------------------------------------------------------------------------|--------------------------------------------|
| Setting My Medication Reminders Options | Set Date of Medication Reminder<br>Setting My Medical Appointment Reminders | My Medical Checklist Due Today<br>Recorder |
|-----------------------------------------|-----------------------------------------------------------------------------|--------------------------------------------|

|                   |                           |                          |
|-------------------|---------------------------|--------------------------|
| My Medication Log | <input type="radio"/> Yes | <input type="radio"/> No |
|-------------------|---------------------------|--------------------------|

My Medication Pill ID

Log Options

Summary of My Medication Log

My Lab Reports

- Yes
- No

Lab Reports Options

Glucose/ CBC  
STDs

CD4/ viral load

My Pharmacy Info

- Yes

- No

Nutrition and Fitness

- Yes

- No

Nutrition and Fitness Options

Nutrition  
Physical Activity

Resources

- Yes

- No

Resources – Options

HIV medical Care  
Social Services  
Substance Use  
Law/Advocacy

My Sexual Risk Calculator  
How to Use a Condom  
HIV Video Testimonials  
HIV medical dictionary

Settings

- Yes

- No

Settings - Options

User Name  
Password Profile  
picture Alerts: HIV Info  
Alerts: HIV news

Medical Alerts: Medications  
Missed Medical Alerts: medication refills  
Medical Alerts: missed appointments
